# Supplementary material
Source: MDPI journal article supplement (https://www.mdpi.com/2411-5142/9/1/33)
Supplement: s1 [file s1]

**Table S1.** Relationship between weight status and physical activity levels, adherence to MD and physical and mental health.

|                                         | Normal-weight |             |            | Overweight |            |            | Obese      |             |            |
|-----------------------------------------|---------------|-------------|------------|------------|------------|------------|------------|-------------|------------|
|                                         | TS            | NS          | PS         | TS         | NS         | PS         | TS         | NS          | PS         |
| <b>Physical activity levels</b>         |               |             |            |            |            |            |            |             |            |
| <b>Inactive</b>                         | 327±211       | 308±237,5   | 350±181    | 426±154    | 465±143,3  | 398±166    | 272±123    | 210±84,9    | 395± -     |
| <b>Sufficiently Active</b>              | 1641±541      | 1609±535,7  | 1668±552   | 1342±459   | 1395±504,9 | 1278±417   | 1604±484   | 1380±505    | 1717±477   |
| <b>Active or highly active</b>          | 5094±2773     | 5410±3373   | 4936±2435  | 3935±1515  | 3865±1558  | 4011±1531  | 5898±3044  | 7613±1601.6 | 5040±3414  |
| <b>MD<sup>a</sup> Adherence (score)</b> |               |             |            |            |            |            |            |             |            |
| <b>MD<sup>a</sup></b>                   | 8.90±1.97     | 9.14±2.09   | 8.73±1.88  | 8.82±1.82  | 9.03±1.55  | 8.61±2.08  | 8.56±1.38  | 8.14±1.68   | 8.82±1.17  |
| <b>SF-12 (score)</b>                    |               |             |            |            |            |            |            |             |            |
| <b>PCS<sup>b</sup></b>                  | 50.12±7.33    | 49.39±7.59* | 50.65±7.13 | 49.11±8.04 | 47.51±8.21 | 50.76±7.64 | 46.36±6.89 | 42.72±5.43* | 48.68±6.91 |
| <b>MCS<sup>c</sup></b>                  | 51.42±8.17    | 51.70±8.03  | 51.23±8.29 | 51.30±8.42 | 52.23±6.75 | 50.34±9.90 | 55.03±4.38 | 56.20±5.32  | 54.28±3.75 |

a, Mediterranean Diet; b, Physical Component Summary; c, Mental Component Summary; \*p < 0.05; \*\*p < 0.01 \*\*\*p<0.001
