# Supplementary material
Source: MDPI journal article supplement (https://www.mdpi.com/2411-5142/9/1/33)
Supplement: s1 [file s1]

**Table S2.** Relationship between educational levels and physical activity levels, adherence to MD and physical and mental health.

|                                         | Secondary School |            |              | Graduation Degree |            |              |
|-----------------------------------------|------------------|------------|--------------|-------------------|------------|--------------|
|                                         | TS               | NS         | PS           | TS                | NS         | PS           |
| <b>Physical activity levels</b>         |                  |            |              |                   |            |              |
| <b>Inactive</b>                         | 384±190          | 363±217    | 408±159      | 301±198           | 287±229    | 316±175      |
| <b>Sufficiently Active</b>              | 1602±545         | 1508±564   | 1700±520     | 1558±521          | 1579±496   | 1542±548     |
| <b>Active or highly active</b>          | 5248±2808        | 5437±3020  | 5118±2686    | 4534±2364         | 4592±2991  | 4505±2024    |
| <b>MD<sup>a</sup> Adherence (score)</b> |                  |            |              |                   |            |              |
| <b>MD<sup>a</sup></b>                   | 8.81±1.84        | 9.03±1.91  | 8.61±1.77    | 8.91±1.97         | 9.08±2.01  | 8.80±1.95    |
| <b>SF-12 (score)</b>                    |                  |            |              |                   |            |              |
| <b>PCS<sup>b</sup></b>                  | 49.76±7.49       | 48.41±7.64 | 50.96±7.20   | 49.54±7.53        | 48.62±7.99 | 50.15±7.19   |
| <b>MCS<sup>c</sup></b>                  | 52.66±7.27*      | 52.25±7.15 | 53.03±7.41** | 50.62±8.67*       | 51.93±8.19 | 49.76±8.92** |

a, Mediterranean Diet; b, Physical Component Summary; c, Mental Component Summary; \*p < 0.05; \*\*p < 0.01 \*\*\*p<0.001
